# Supplementary material for: Revealing the electrochemical performance of a manganese phosphite/RGO hybrid in acidic media
Source: Royal Society of Chemistry journal article supplement (doi:10.1039/d2dt02390c), 2022-01-01
Supplement: d2dt02390c1.pdf [file d2dt02390c1.pdf]

# Revealing the electrochemical performance of manganese phosphite/RGO hybrid in acidic media

*Abhisek Padhy*<sup>ab</sup>, *Rahul Kumar*<sup>ab</sup>, *J. N. Behera*<sup>\*ab</sup>

<sup>a</sup> National Institute of Science Education and Research (NISER), An OCC of Homi Bhabha National Institute (HBNI), Jatni, Khordha 752050, Odisha, India. E-mail: [jnbehera@niser.ac.in](mailto:jnbehera@niser.ac.in)

<sup>b</sup> Centre for Interdisciplinary Sciences (CIS), NISER, Jatni 752050, Odisha, India

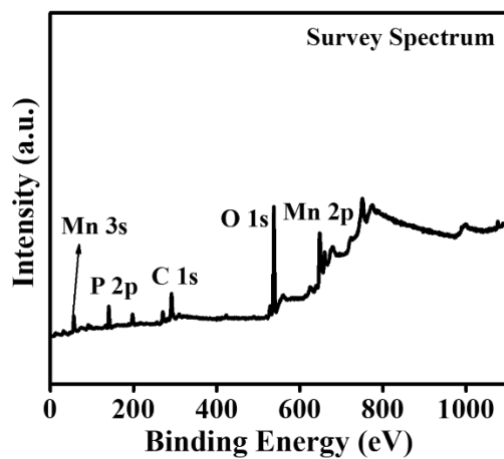

**Fig. S1** XPS survey spectra of Mn-HPO/RGO hybrid.

| Element | Weight % |
|---------|----------|
| Mn      | 23.6     |
| P       | 8.9      |
| O       | 45.5     |
| C       | 22       |

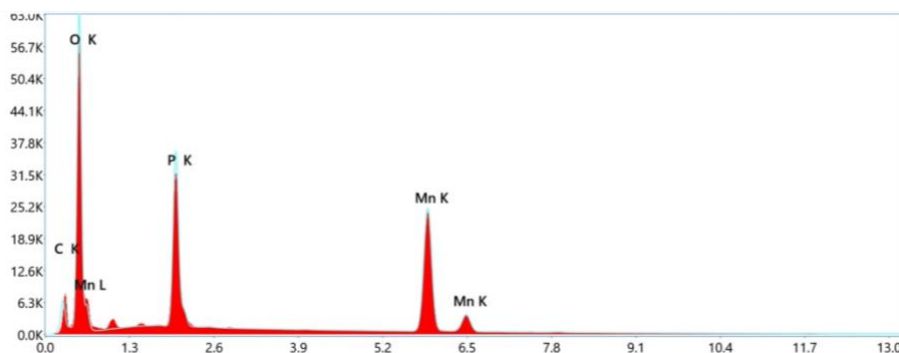

**Fig. S2** EDX spectra of the Mn-HPO/RGO hybrid with atomic percentage of elements.

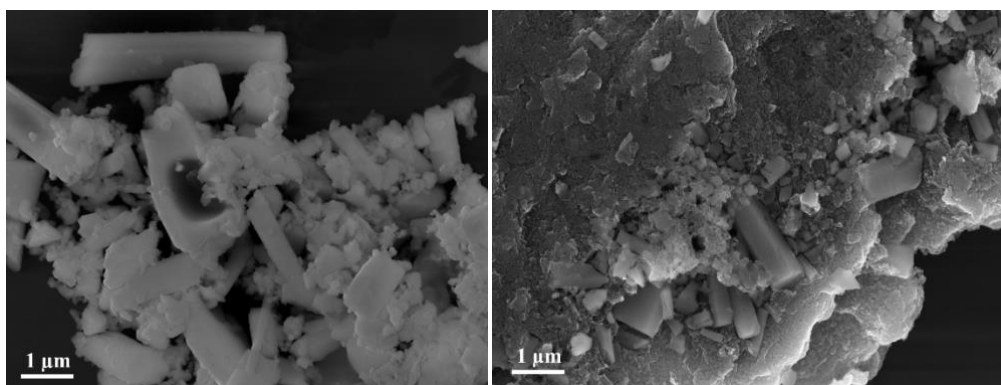

**Fig. S3** SEM images of Mn-HPO/RGO synthesized with 5 mg and 20 mg GO

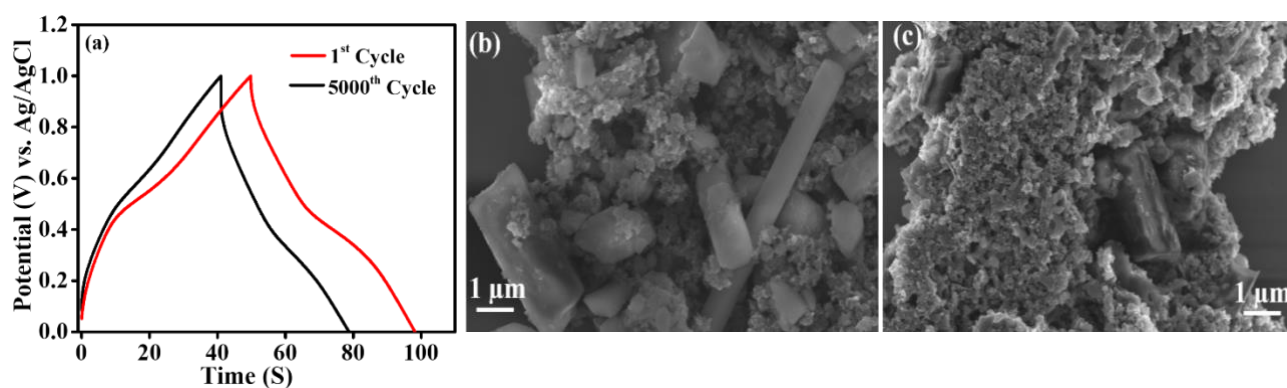

**Fig. S4** Charge-discharge curve for 1<sup>st</sup> and 5000<sup>th</sup> cycle along with the morphology of the active material before and after cyclic stability

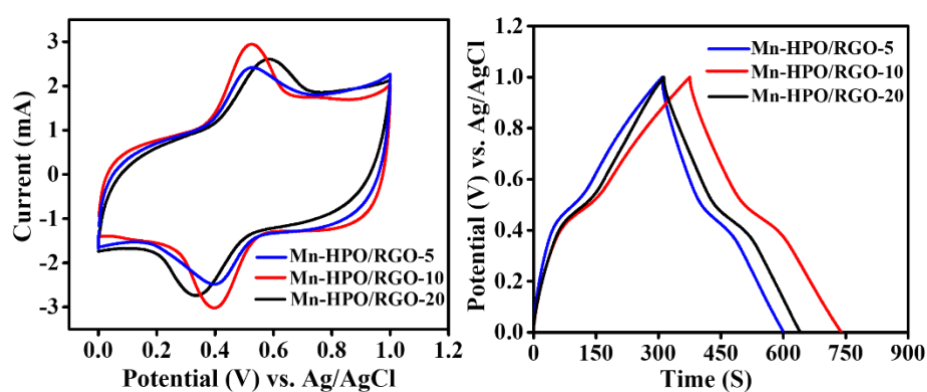

**Fig. S5** CV curves at 5 mV/s and GCD curves at 1 A/g for Mn-HPO/RGO-5, Mn-HPO/RGO-10 and Mn-HPO/RGO-20.

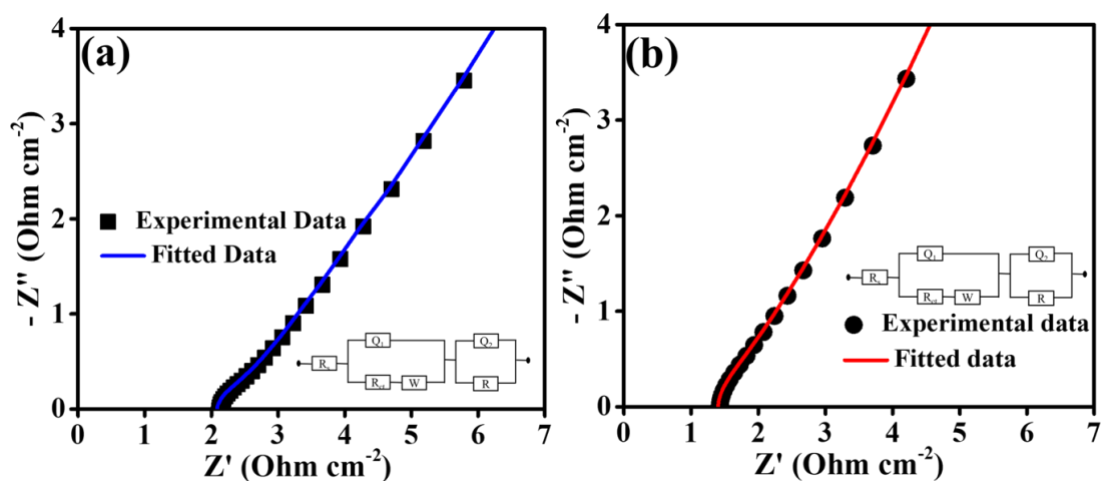

**Fig. S6** EIS spectra of (a) Mn-HPO and (b) Mn-HPO/RGO-10 with fitted data.

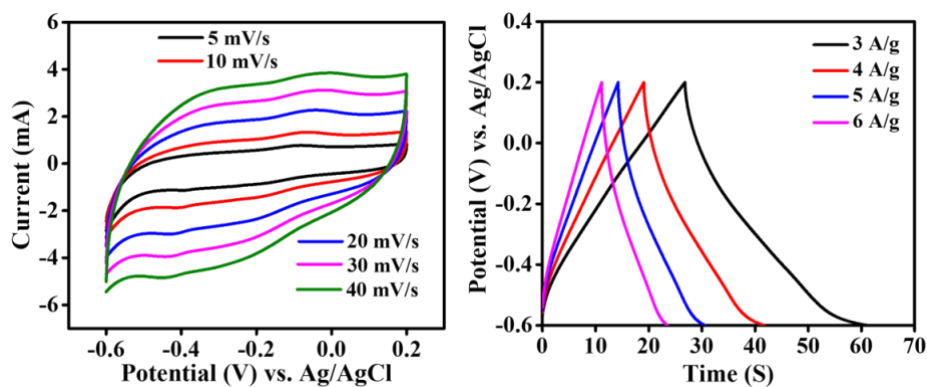

**Fig. S7** CV and GCD curves MXene ( $\text{Ti}_3\text{C}_2$ ).

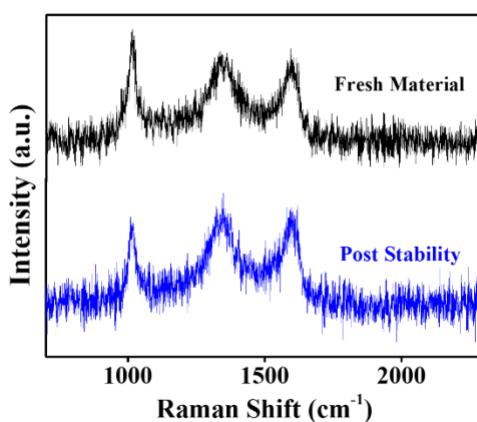

**Fig. S8** Raman spectra of the fresh electroactive material and the electroactive material after stability

**Table S1** Comparison of supercapacitor performance of Mn-HPO/RGO with previous reports

| Name of the Material                                                     | Specific Capacitance (F/g) | Electrolyte                  | Rate performance (in %) | Specific Capacitance of the device (F/g) | Energy Density of the Device (Wh/kg) | Cyclic Stability          | References |
|--------------------------------------------------------------------------|----------------------------|------------------------------|-------------------------|------------------------------------------|--------------------------------------|---------------------------|------------|
| $\text{MnO}_x\text{@C@MnO}_x$                                            | 350                        | 6 M KOH                      | 34.8 %                  | 53.4                                     | 23                                   | 94 % up to 2000 cycles    | <b>1</b>   |
| ov- $\text{MnO}_2\text{@MnO}_2$                                          | 452.4                      | 1 M $\text{Na}_2\text{SO}_4$ | 69.9 %                  | 90.8                                     | 40.2                                 | 92.2 % up to 10000 cycles | <b>2</b>   |
| $\text{Ti}_3\text{C}_2\text{T}_x$ (MXene)- $\delta$ - $\text{MnO}_2$ ASC | -                          | 1 M $\text{Na}_2\text{SO}_4$ | -                       | 23.3                                     | 8.3                                  | -                         | <b>3</b>   |

|                                                     |            |                                           |             |            |           |                                |                  |
|-----------------------------------------------------|------------|-------------------------------------------|-------------|------------|-----------|--------------------------------|------------------|
| Mn <sub>3</sub> (PO <sub>4</sub> ) <sub>2</sub> /GF | 270        | 6 M KOH                                   | -           | 28         | 7.6       | 96 % up to 10000 cycles        | <b>4</b>         |
| Mn <sub>3</sub> (PO <sub>4</sub> ) <sub>2</sub>     | 203        | 1 M Na <sub>2</sub> SO <sub>4</sub>       | 88 %        | 46.8       | 16.64     | 90 % up to 10000 cycles        | <b>5</b>         |
| Mn <sub>3</sub> (PO <sub>4</sub> ) <sub>2</sub>     | 194        | 2 M KOH                                   | 85 %        | 41.9       | 14.89     | 90 % up to 10000 cycles        | <b>5</b>         |
| NH <sub>4</sub> MnPO <sub>4</sub> ·H <sub>2</sub> O | 423        | 3 M KOH                                   | 65 %        | 65.4       | 29.4      | 93 % up to 100k cycles         | <b>6</b>         |
| Amorphous Manganese phosphate                       | 912.4      | 1 M Na <sub>2</sub> SO <sub>4</sub> + PBS | 66.6 %      | 205.59     | 126       | 95 % up to 5000 cycles         | <b>7</b>         |
| <b>Mn-HPO/RGO hybrid</b>                            | <b>770</b> | <b>1 M H<sub>2</sub>SO<sub>4</sub></b>    | <b>67 %</b> | <b>108</b> | <b>34</b> | <b>94 % up to 12000 cycles</b> | <b>This work</b> |

### References.

- 1 Z. Ma, F. Jing, Y. Fan, L. Hou, L. Su, L. Fan and G. Shao, *Small*, 2019, **15**, 1900862.
- 2 Y. Fu, X. Gao, D. Zha, J. Zhu, X. Ouyang and X. Wang, *J. Mater. Chem. A*, 2018, **6**, 1601–1611.
- 3 C. K. Kamaja, S. Mitra, Gaganjot and M. Katiyar, *Energy & Fuels*, 2022, **36**, 703–709.
- 4 A. A. Mirghni, M. J. Madito, T. M. Masikhwa, K. O. Oyedotun, A. Bello and N. Manyala, *J. Colloid Interface Sci.*, 2017, **494**, 325–337.
- 5 X.-J. Ma, W.-B. Zhang, L.-B. Kong, Y.-C. Luo and L. Kang, *RSC Adv.*, 2016, **6**, 40077–40085.
- 6 K. Raju, H. Han, D. B. Velusamy, Q. Jiang, H. Yang, F. P. Nkosi, N. Palaniandy, K. Makgopa, Z. Bo and K. I. Ozoemena, *ACS Energy Lett.*, 2020, **5**, 23–30.
- 7 D. Yang, Y. Song, M. Zhang, Z. Qin, R. Dong, C. Li and X. Liu, *Adv. Funct. Mater.*, 2021, **31**, 2100477.
